# Supplementary material for: Serosurvey of SARS-COV-2 at a large public university
Source: bioRxiv or medRxiv preprint supplement (doi:10.1101/2023.02.05.23285494), 2023-02-07
Supplement: Supplementary file [file media-1.pdf]

**Supplemental data for**  
**Serosurvey of SARS-COV-2 at a large public university**

Ching-Wen Hou<sup>1</sup>, Stacy Williams<sup>1</sup>, Kylee Taylor<sup>1</sup>, Veronica Boyle<sup>1</sup>, Bradley Bobbett<sup>1</sup>, Joseph Kouvetakis<sup>1</sup>, Keana Nguyen<sup>1</sup>, Aaron McDonald<sup>1</sup>, Valerie Harris<sup>2</sup>, Benjamin Nussle<sup>1</sup>, Phillip Scharf<sup>3</sup>, Megan Jehn<sup>4</sup>, Timothy Lant<sup>2</sup>, Mitch Magee<sup>1</sup>, Yunro Chung<sup>1,5</sup>, Joshua Labaer<sup>1</sup>, Vel Murugan <sup>1\*</sup>

<sup>1</sup>Virginia G. Piper Center for Personalized Diagnostics, Biodesign Institute, Arizona State University, Tempe, AZ, USA

<sup>2</sup>Office of VP Research Development, Arizona State University, Tempe, AZ, USA

<sup>3</sup>College of Liberal Arts and Sciences, Arizona State University, Tempe, AZ, USA

<sup>4</sup>School of Human Evolution and Social Change, Arizona State University, Tempe, AZ, USA

<sup>5</sup>College of Health Solutions, Arizona State University, Phoenix, AZ, USA

\*Corresponding author. Email: [vel.murugan@asu.edu](mailto:vel.murugan@asu.edu)

**Supplementary Table 1:** Manufacturer reported sensitivity and specificity of EUA authorized tests used in this study

| Assay                                               | Sensitivity (positive percent agreement at $\geq$ 15 days post symptom onset) | Specificity |
|-----------------------------------------------------|-------------------------------------------------------------------------------|-------------|
| Chemiluminescent assay: Beckman (Anti-RBD IgG)      | 98.9%                                                                         | 100%        |
| Later flow assay: Clarity (Anti-RBD IgG)            | 96.15%                                                                        | 100%        |
| Later flow assay: Megna (Anti-NC IgG)               | 95%                                                                           | 99.3%       |
| ELISA: Bio-Rad (Anti-NC IgM/IgG/IgA)                | 100%                                                                          | 98.86%      |
| Electrochemiluminescence assay: MSD* (Anti-NC IgG)  | 93.8%                                                                         | 100%        |
| Electrochemiluminescence assay: MSD* (Anti-RBD IgG) | 98.3%                                                                         | 98.5%       |

\*MSD is not a EUA authorized test. It is a validated assay meets the clinical laboratory standards institute guidelines.

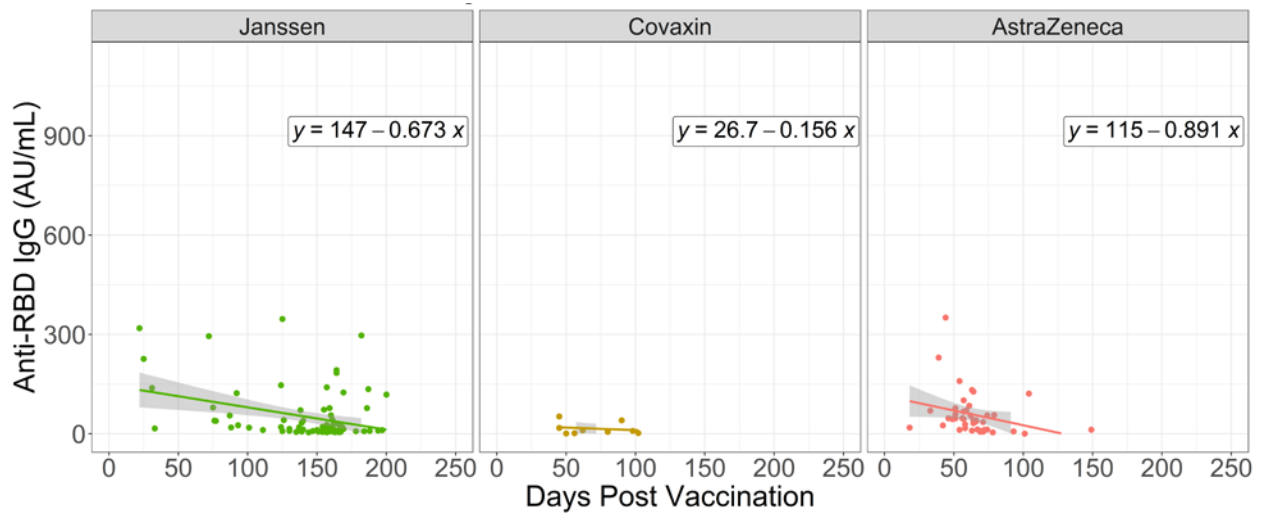

**Supplementary Figure 1: Anti-RBD antibody decay post-vaccination.** The antibody level is determined by the Beckman immunoassay. The linear regression of different vaccines to estimate vaccine decay.

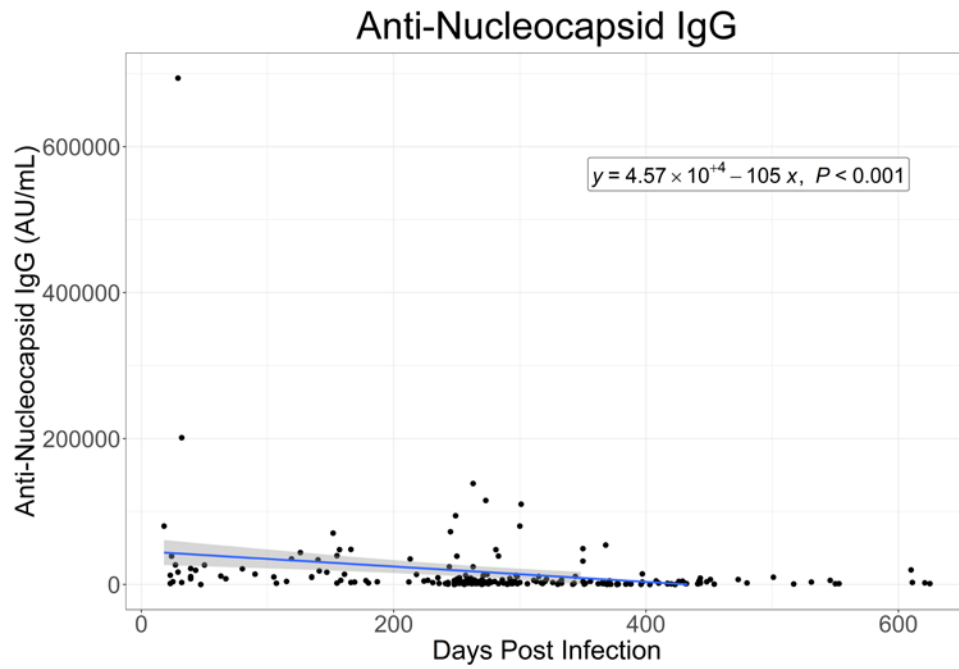

**Supplementary Figure 2: Anti-Nucleocapsid antibody decay post-infection.** The antibody level is determined by the MSD. The linear regression was to estimate antibody decay.
